# Supplementary material for: Improved photovoltaic performance of P3HT:PCBM cells by addition of a low band-gap oligomer
Source: Royal Society of Chemistry journal article supplement (doi:10.1039/c0cc03962d), 2010-11-15
Supplement: c0cc03962d.pdf [file c0cc03962d.pdf]

## Improved photovoltaic performance of P3HT:PCBM cells by addition of a low band gap oligomer

Eunhee Lim,\* Sungkoo Lee and Kyeong K. Lee

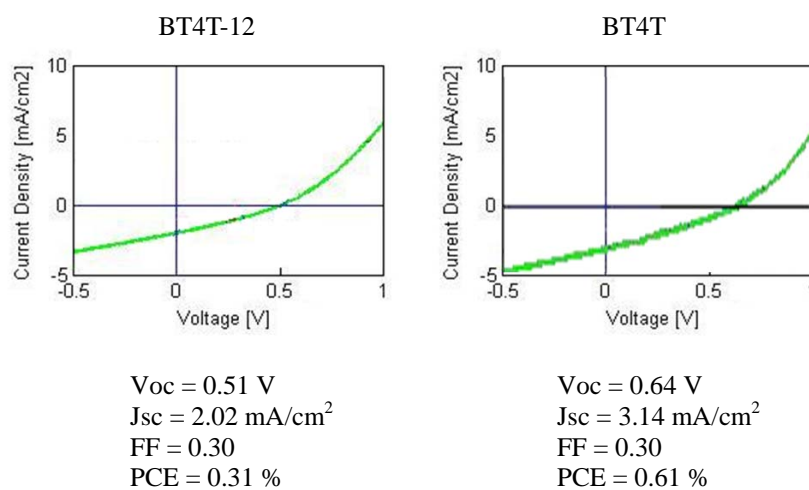

Figure S1. *J-V* curves of oligomers
